# Supplementary material for: Brain-inspired synaptic transistors for in-situ spiking reinforcement learning with eligibility trace
Source: Research Square preprint supplement (doi:10.21203/rs.3.rs-6296374/v1), 2025-03-31
Supplement: Supplementary file 1 [file 345458c0f23137e4ac2e03ad.docx]

**Supplementary Information**

**Brain-inspired synaptic transistors for in-situ spiking reinforcement learning with eligibility trace**

Yasai Wang1,2, Weiwei Xiong1,2, Jianmin Yan2, Yue Zhou2, Chaoyi Zhu2, Xiangshui Miao1, Yuhui He1* and Yang Chai2*

1School of Integrated Circuits, Huazhong University of Science and Technology, Wuhan, 430000, China.

2Department of Applied Physics, The Hong Kong Polytechnic University, Hong Kong, 999077, China.

E-mail: [heyuhui@hust.edu.cn](mailto:heyuhui@hust.edu.cn), [ychai@polyu.edu.hk](mailto:ychai@polyu.edu.hk)


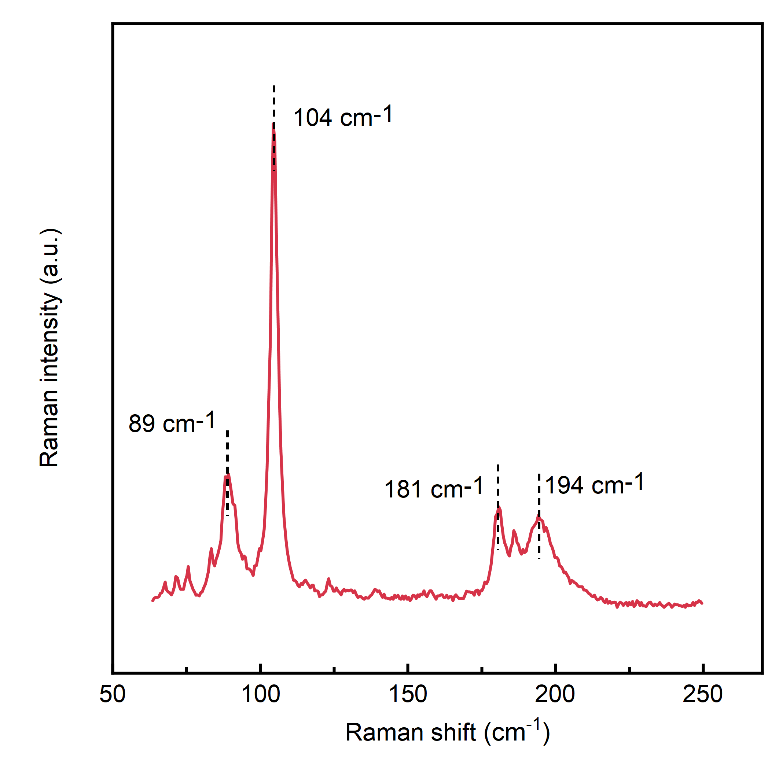

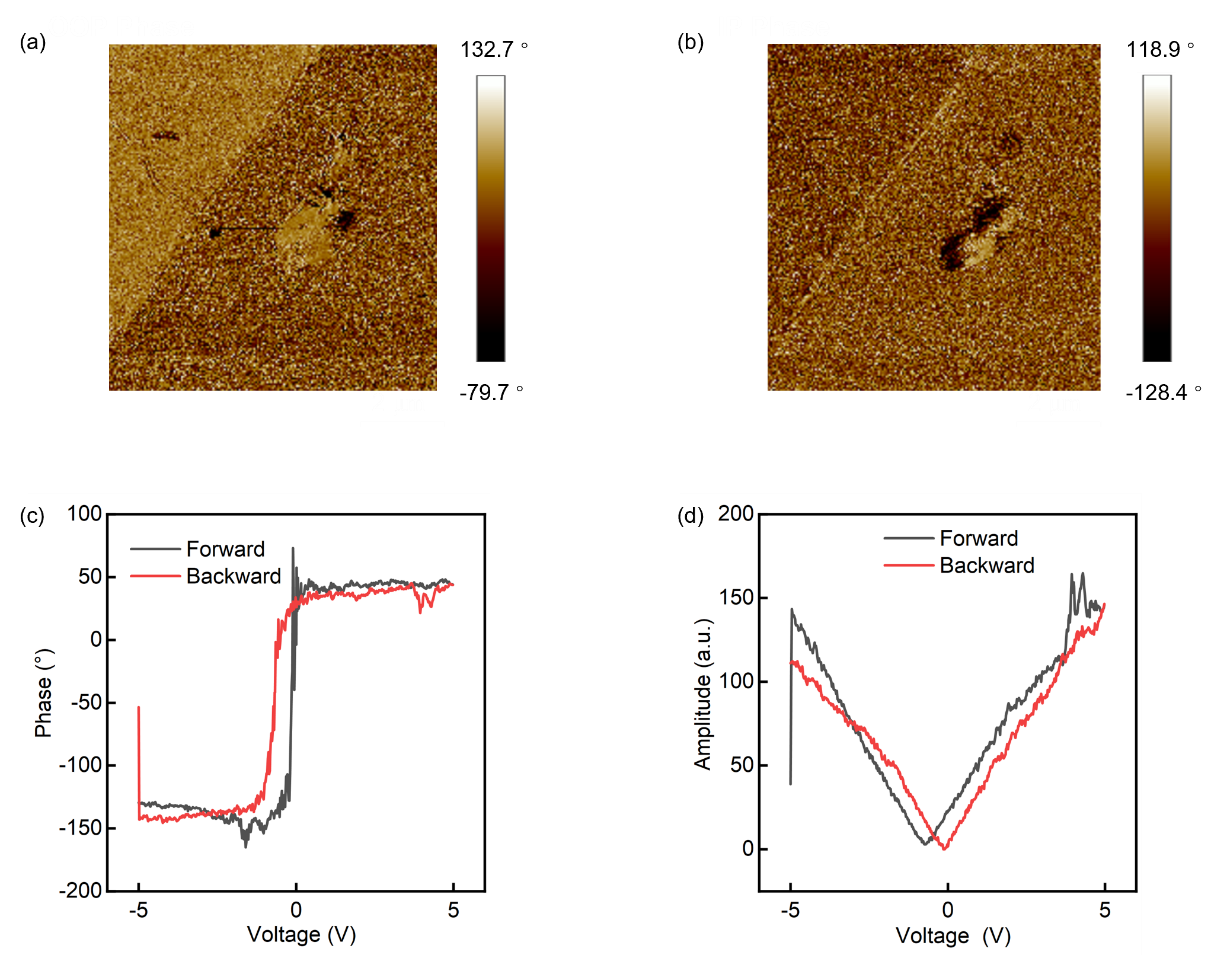


**Supplementary Fig.1. The Raman spectrum of the fabricated -In2Se3.** With peaks presented at 89 cm−1, 104 cm−1, 181 cm−1 and 194 cm−1, indicating it is α-phase In2Se3

**Supplementary Fig.2. PFM characterization of -In2Se3.** The (a) OOP and (b) IP PFM phase images. Local ferroelectric switching loops of phase (c) and amplitude(d). These results show the ferroelectric polarization switching under external electric field.

*
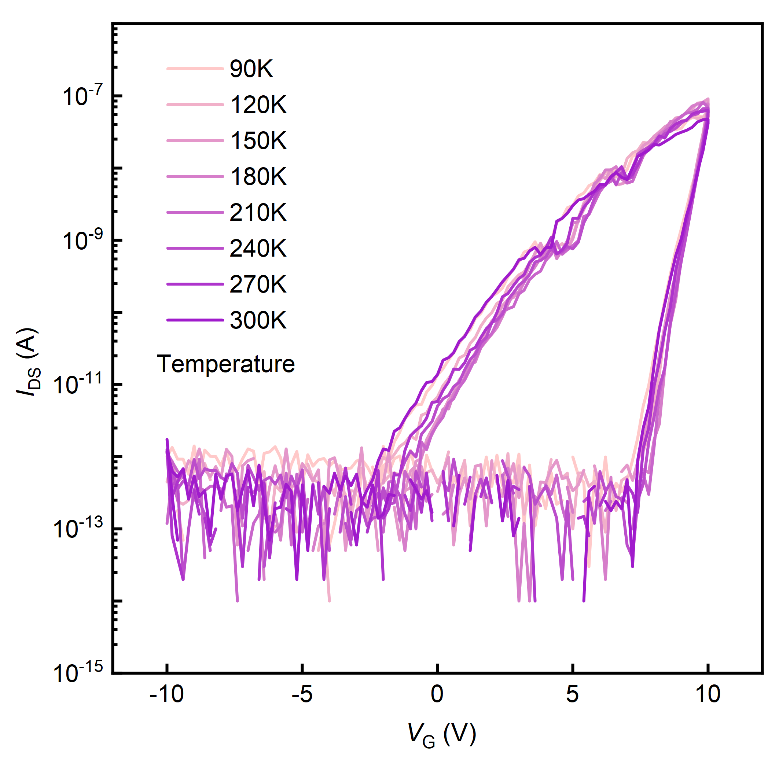

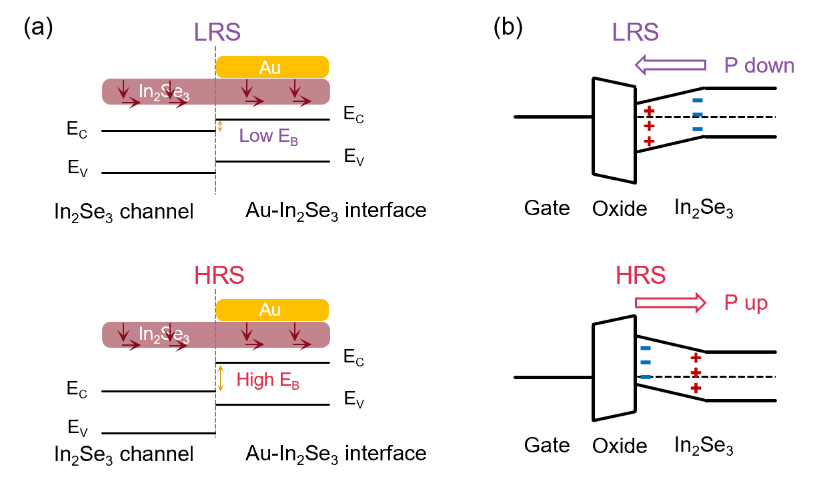
*

Supplementary Fig.4. IP (a) and OOP (b) polarization resistance switching mechanism of In2Se3 FET. In IP polarization switching, the channel changes from low resistance state (LRS) to high resistance state (HRS) because the energy barrier (EB) changes from low to high. In OOP polarization switching, due to the change in band bending, the channel changes from electron conduction (P down) to hole conduction (P up), so LRS switches to HRS.

Supplementary Fig.4. IP (a) and OOP (b) polarization resistance switching mechanism of In2Se3 FET. In IP polarization switching, the channel changes from low resistance state (LRS) to high resistance state (HRS) because the energy barrier (EB) changes from low to high. In OOP polarization switching, due to the change in band bending, the channel changes from electron conduction (P down) to hole conduction (P up), so LRS switches to HRS.

**Supplementary Fig.4. IP (a) and OOP (b) polarization resistance switching mechanism of In2Se3 FET.** For IP polarization switching, the channel changes from low resistance state (LRS) to high resistance state (HRS) owing to the variation of energy barrier (EB) from low to high. In OOP polarization switching, due to the change in band bending, the channel changes from electron conduction (P down) to hole conduction (P up), and thus LRS switches to HRS.

**Supplementary Fig.3. The *I*D-*V*G from 90 K to 300 K.** The small fluctuation of the hysteresis window excludes the influence of interface traps and indicates that the hysteresis is caused by OOP ferroelectric switching.


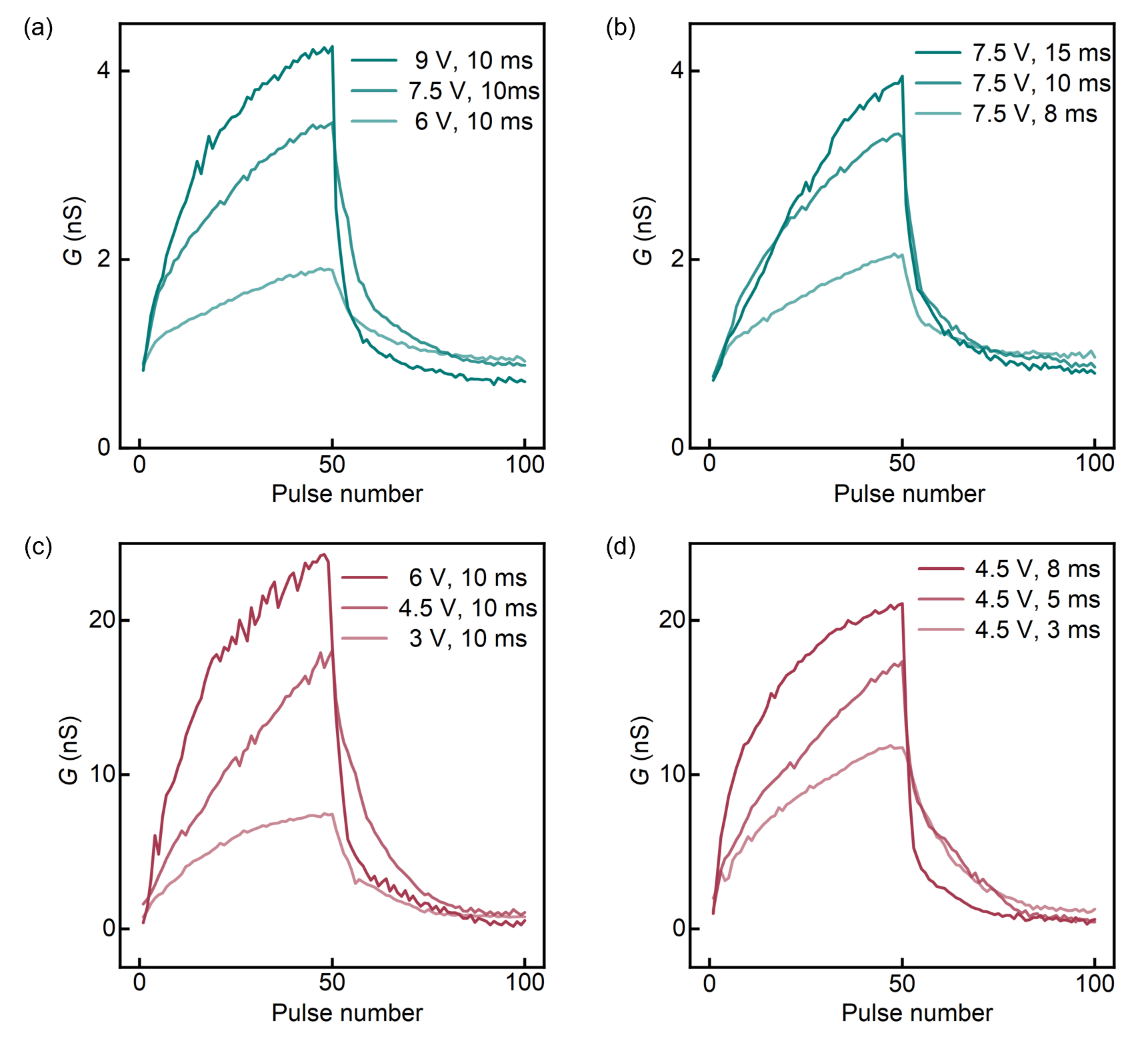

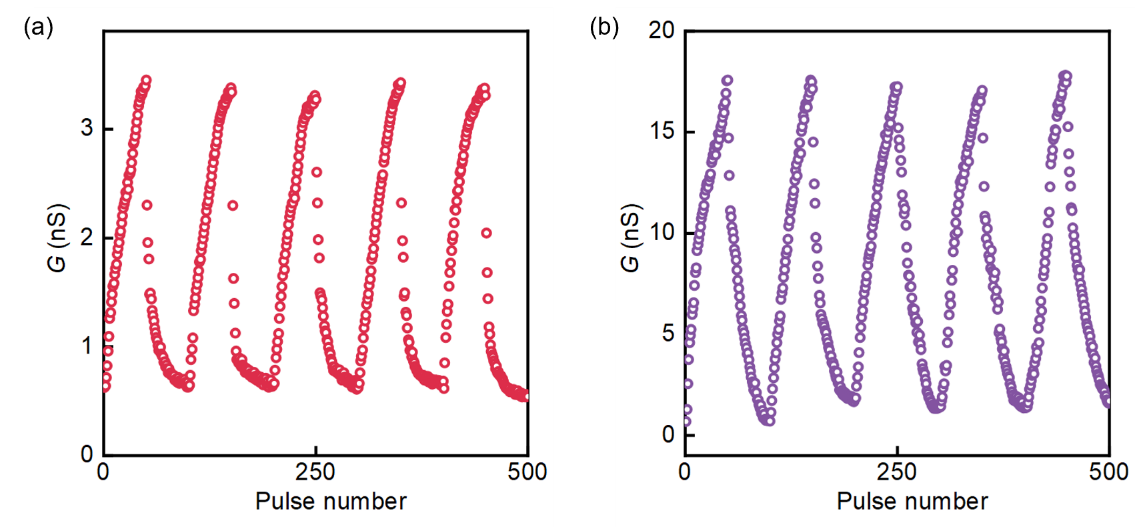


**Supplementary Fig.5. 500 *V*DS (a) and *V*GS (b) pulse cycles.** The results shows excellent consistency of LTP and LTD in both IP and OOP polarization analog modulation. The pulse for *V*DS: ±7.5 V, 10 ms, and *V*GS: ± 4.5 V, 5 ms. The channel length is 1 m and gate dielectric layer is 30 nm Al2O3.

**Supplementary Fig.6. Comparison of conductivity modulation of different *V*DS pulse amplitudes (a) and widths (b).** For *V*GS pulse is shown in (c) and (d). From the comparison results, it can be seen that choosing 7.5 V, 10 ms for *V*DS and 4.5 V, 5 ms for *V*GS can have good linearity and modulation range.

Supplementary Fig.5. 500 *V*DS (a) and *V*GS (b) pulse cycles, showing excellent consistency of LTP and LTD in both IP and OOP polarization analog modulation. The pulse for *V*DS: ±7.5 V, 10 ms, and *V*GS: ± 4.5 V, 5 ms.

Supplementary Fig.4. IP (a) and OOP (b) polarization resistance switching mechanism of In2Se3 FET. In IP polarization switching, the channel changes from low resistance state (LRS) to high resistance state (HRS) because the energy barrier (EB) changes from low to high. In OOP polarization switching, due to the change in band bending, the channel changes from electron conduction (P down) to hole conduction (P up), so LRS switches to HRS.


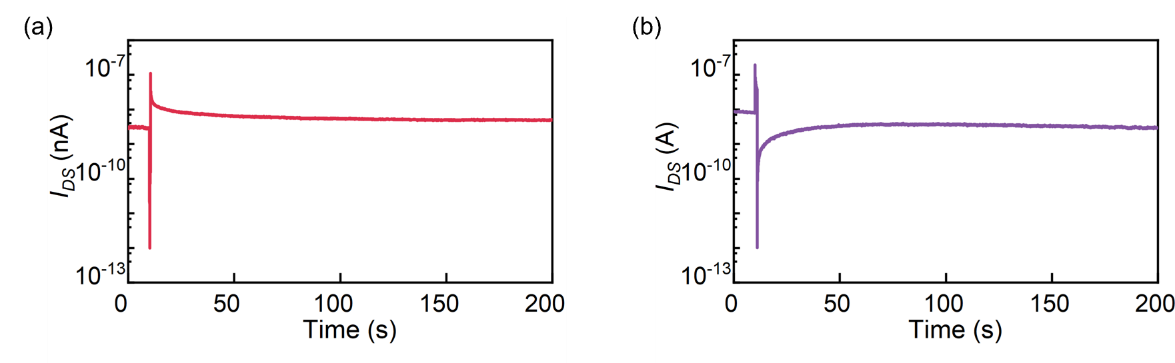


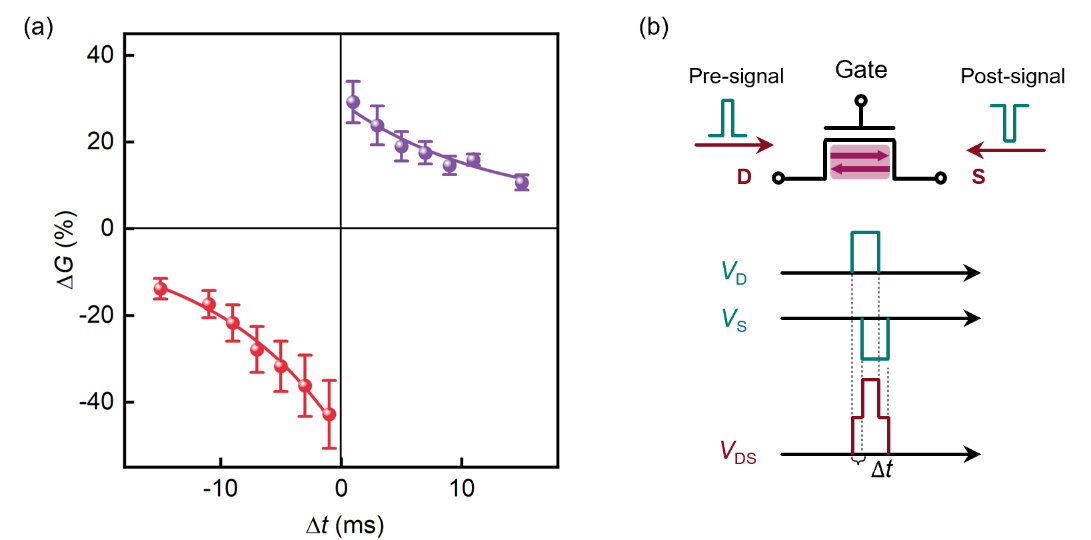


**Supplementary Fig.7. Conductance retention after *V*GS pulse (±7 V, 200 ms).**

**Supplementary Fig.8. Pulse scheme (b) for STDP measurement and result (a).** The pulse height is ±3 V and width is 15 ms.


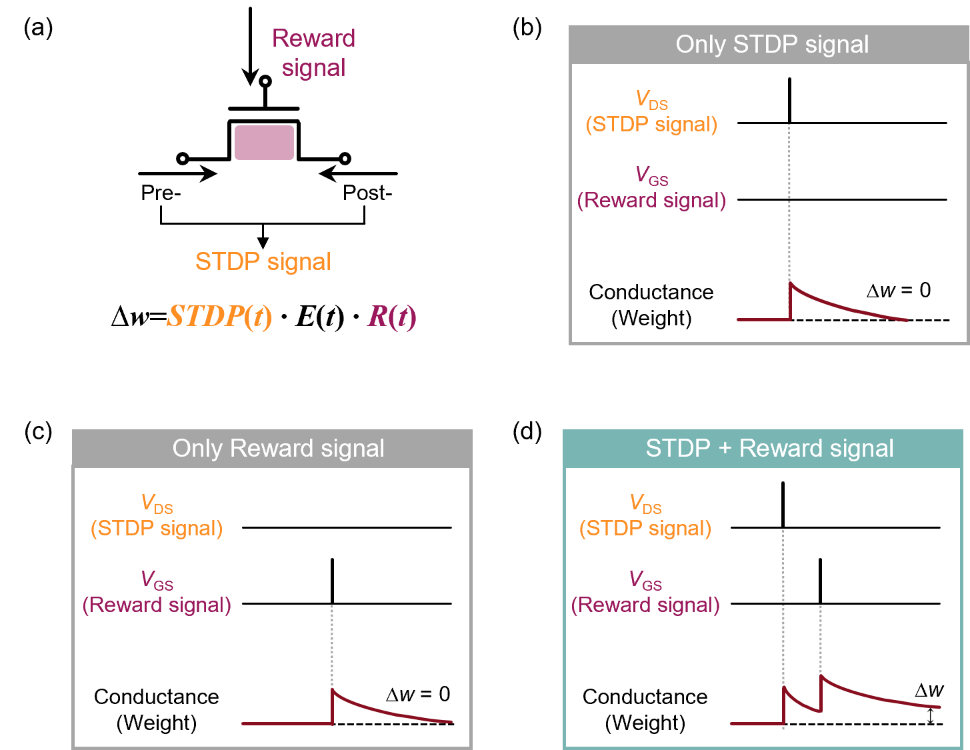


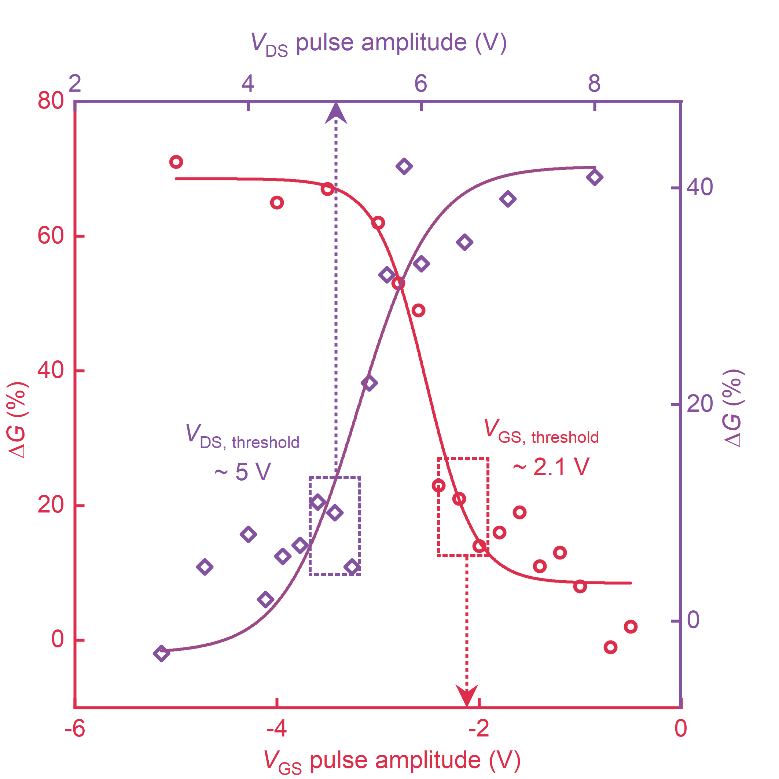


**Supplementary Fig.9. The Principle of the R-STDP Algorithm.** (a) Schematic diagram of the three-terminal synapse of R-STDP by In2Se3 FET. (b), (c) Conductance changes gradually are relaxed given that only STDP or Reward signals are present, since the ferroelectric relaxation conductance decays to the initial state. (d) Conductance changes are kept when STDP and Reward signals are present sequentially. The two signals are superimposed on each other for a short period of time to produce non-volatile conductance modulation.

**Supplementary Fig.10. Statistical results of threshold voltage of *V*GS (a) and *V*DS (b) under a single pulse.**


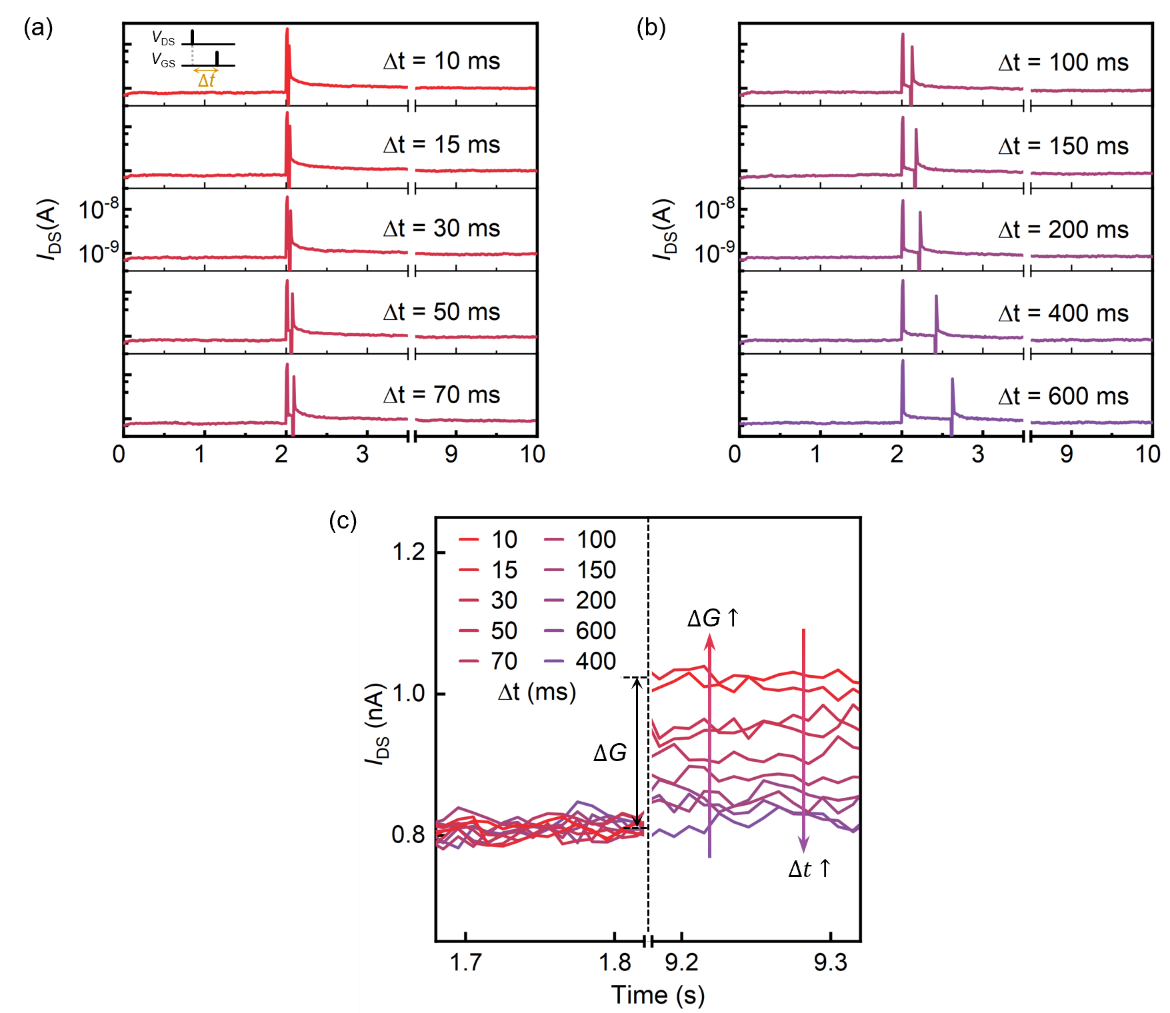


**Supplementary Fig.11. Conductance change by R-STDP.** (a), (b) Continuous *V*DS and *V*GS pulse measurement with different inter-spike timing *t*, corresponding to STDP and Reward signals with different *t* in algorithm. (c) Conductance before (left) and after (right) the pulses.


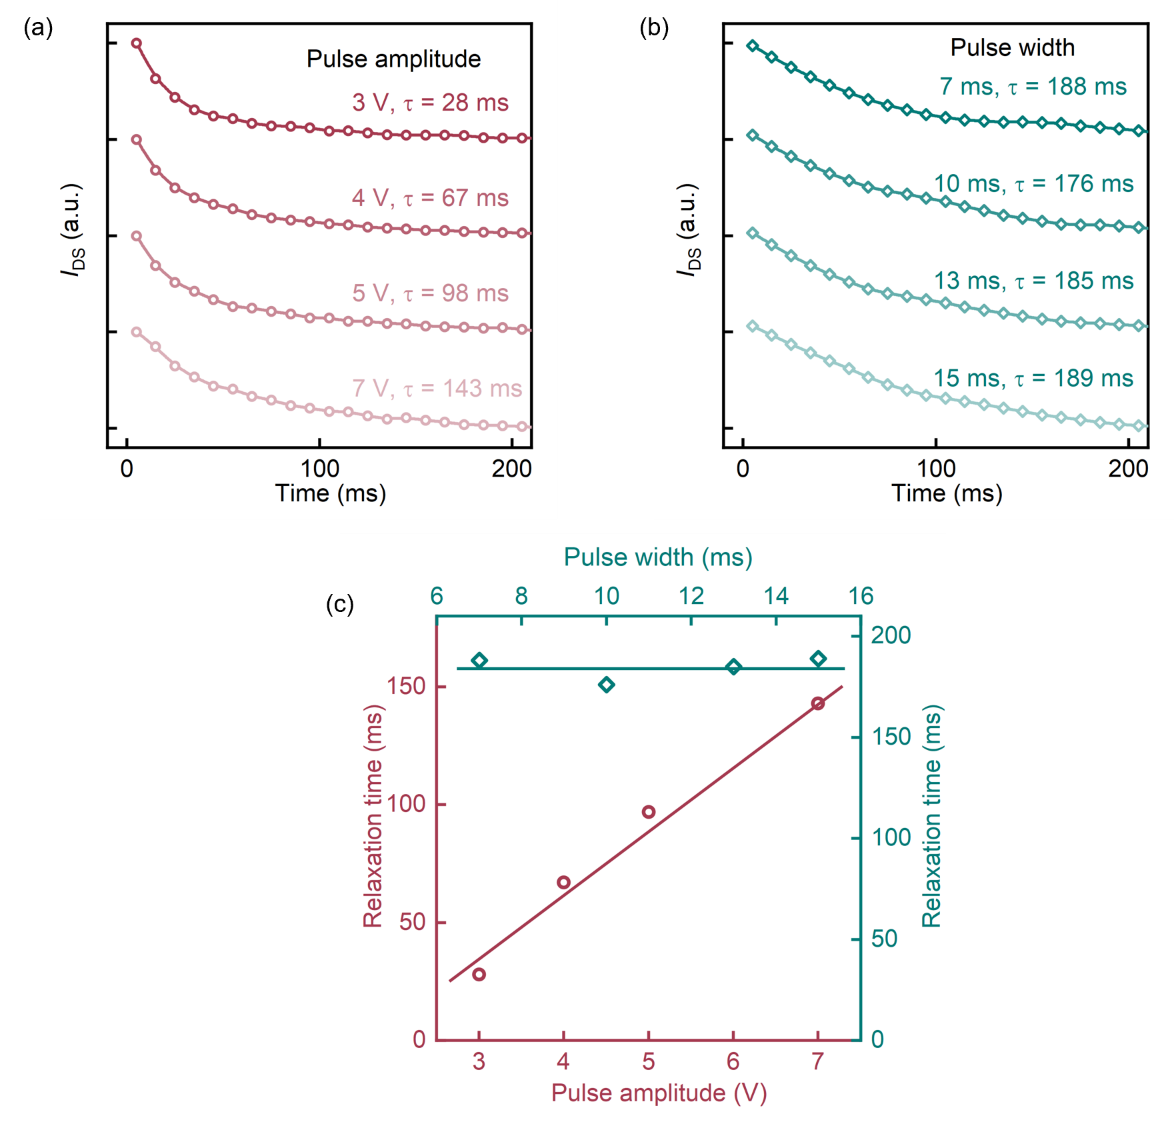


**Supplementary Fig.12. Relaxation time under different pulse amplitudes (a) and widths (b).** Dependence of Relaxation time on the pulse amplitude (bottom-left coordinate and wine line) and the pulse width (up-right coordinate and dark green line) (c). The results show that pulse width has no effect on relaxation time . On the other hand, the larger the pulse amplitude, the longer the relaxation time.

**Supplementary Table 1.** **Comparison of R-STDP implementation by different hardware.**

|  | Demirağ et al.1 | Lu et al.2 | Zhou et al.3 | Amirshahi et al.4 | Luo et al.5 | This work |
| --- | --- | --- | --- | --- | --- | --- |
| Hardware | 3 PCM | 1 PCM+  TIA | 2 FeFET+  1 Selector | 16 MOSFET+  3 Capacitors | 1 FE capacitor + 1 MOSFET | 1 In2Se3 FeS-FET |
| Reward feedback | NO | NO | NO | YES | NO | YES |
| Eligibility trace | ~6 s | ~300 ms | NO | NO | ~3 s | ~28~189 ms |
| Weight range | NO | 2~25 µS | 0.8~26 nS | NA | NO | 0.68~17.5 nS |
| Area | 144 µm2 | 0.5 mm2  (Including TIA) | 100 µm2 | NA | NA | 10 µm2 |


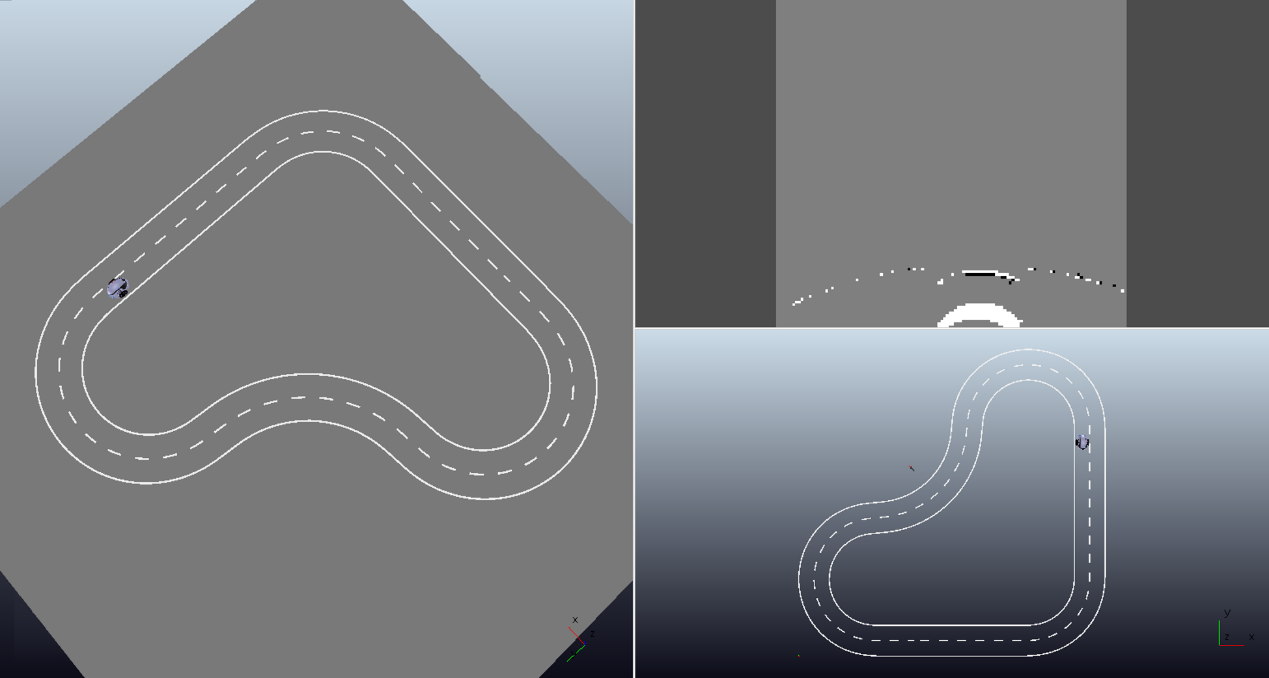


**Supplementary Fig.13. Schematic diagram of lane scenario in autonomous driving task.** The total length of the inner lane is about 29 m, and for the outer lane is about 32 m.


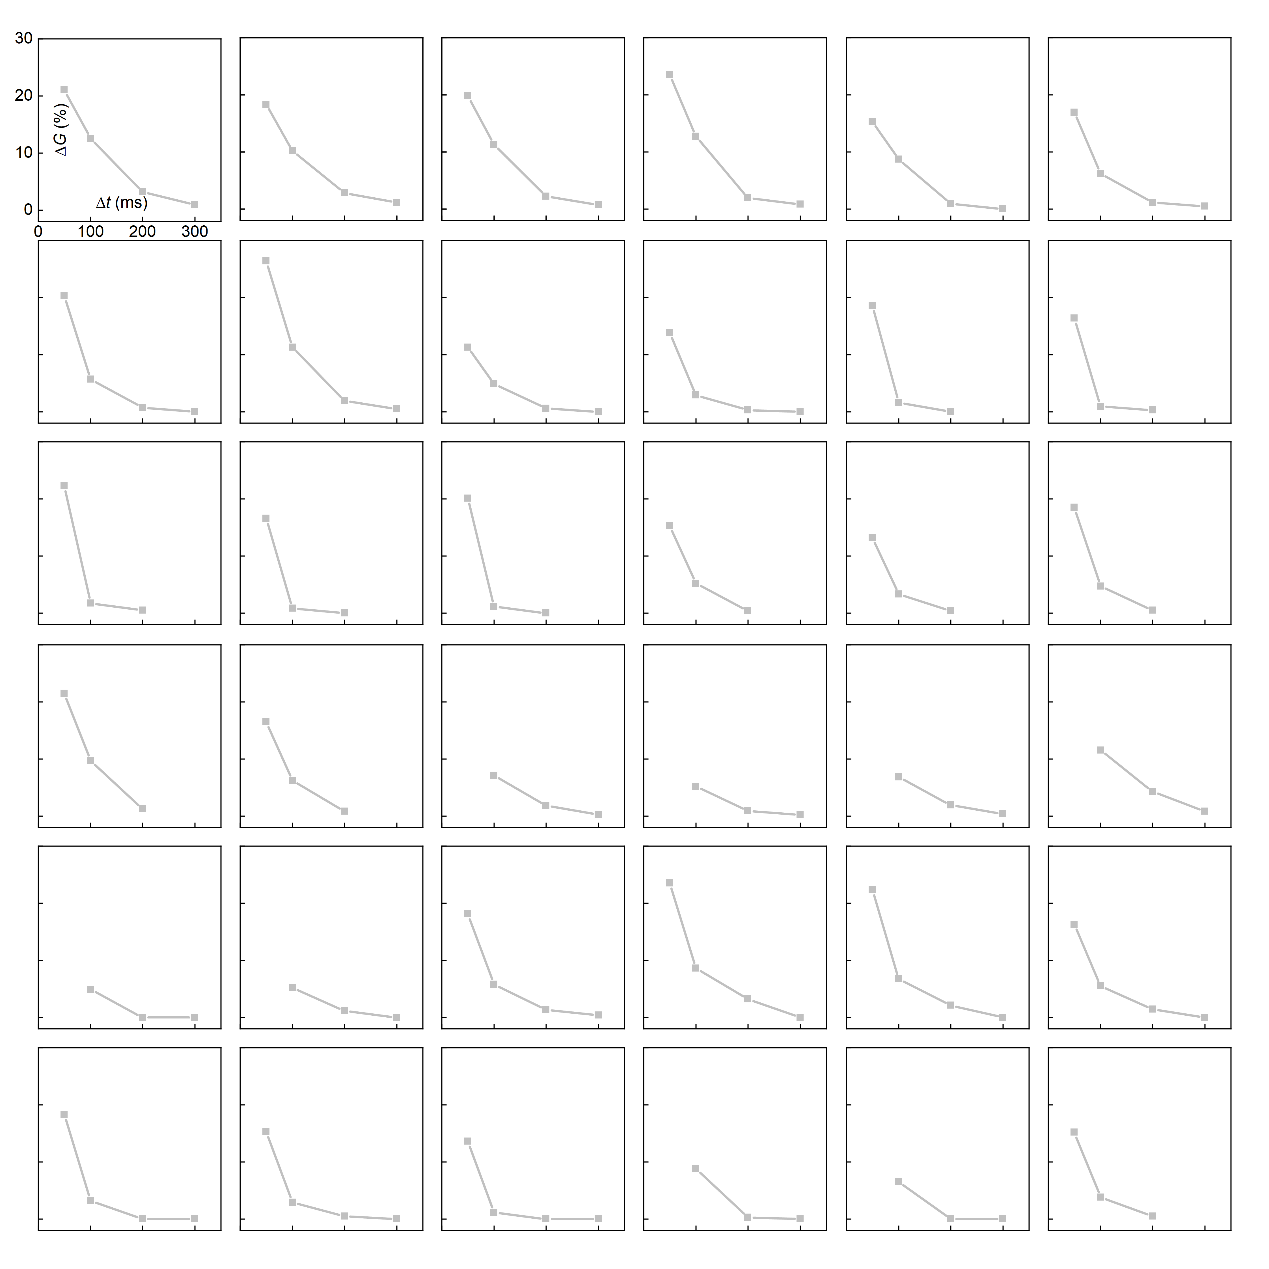


**Supplementary Fig.14. The R-STDP curves of the 36 devices in the In2Se3 FET array.**


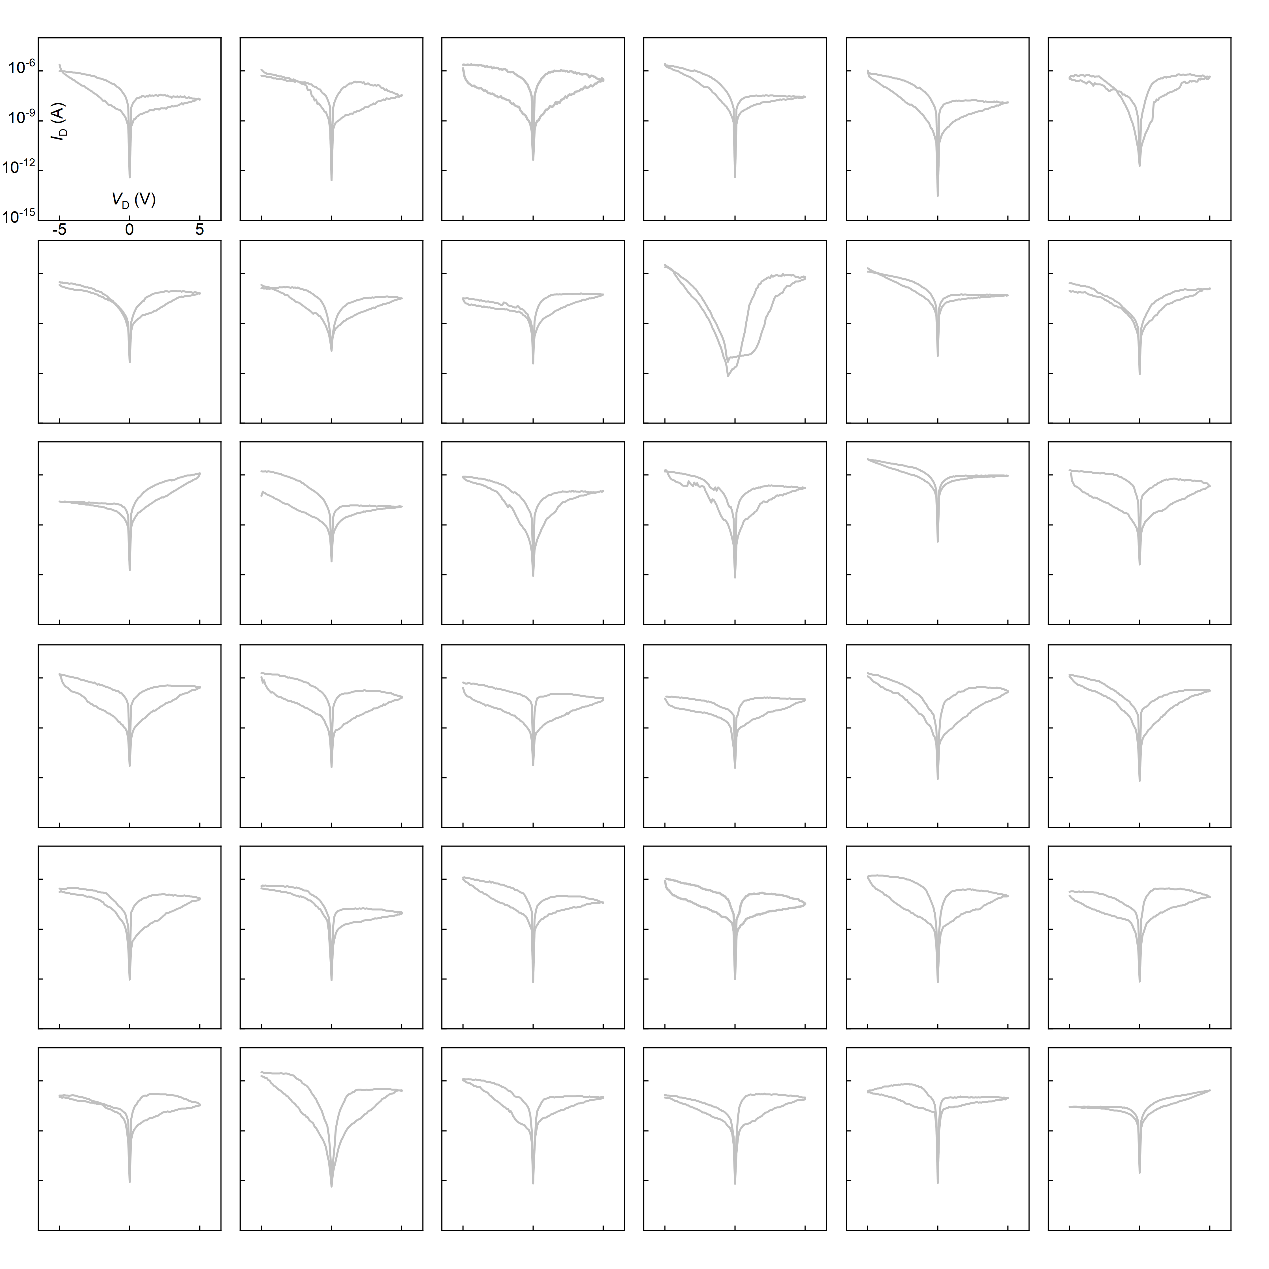


**Supplementary Fig.15. The *I*D-*V*D (IP polarization) curves of the 36 devices in the In2Se3 FET array.**


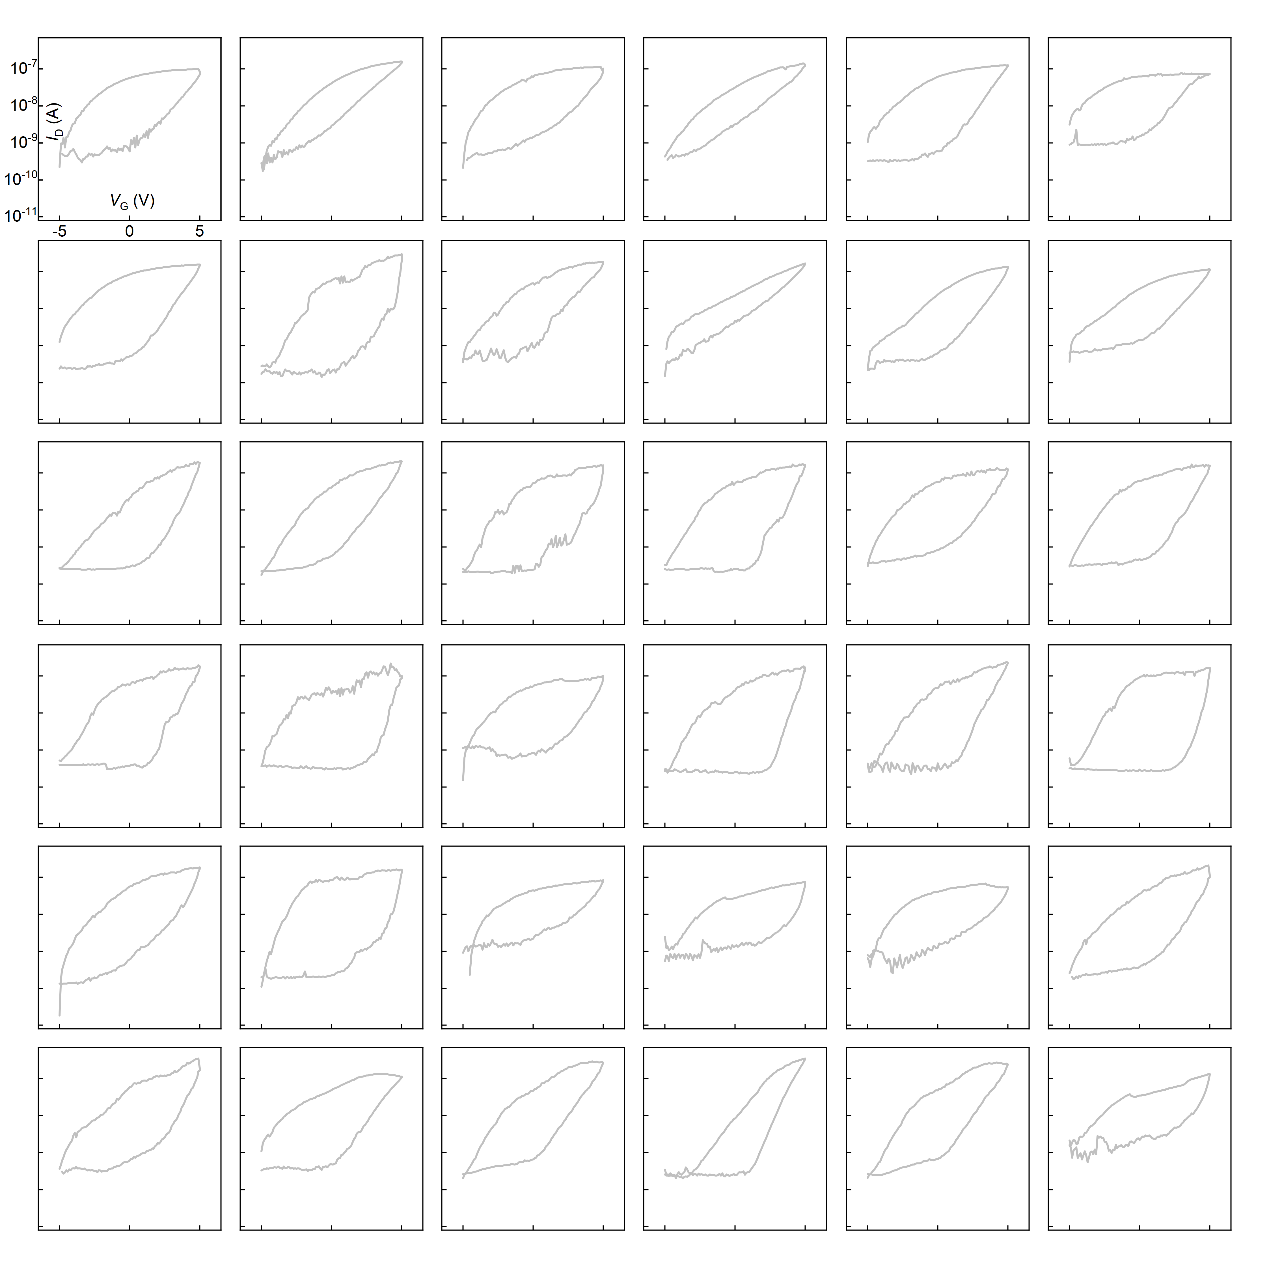


**Supplementary Fig.16. (a) The *I*D-*V*G (OOP polarization) curves of the 36 devices in the In2Se3 FET array.**


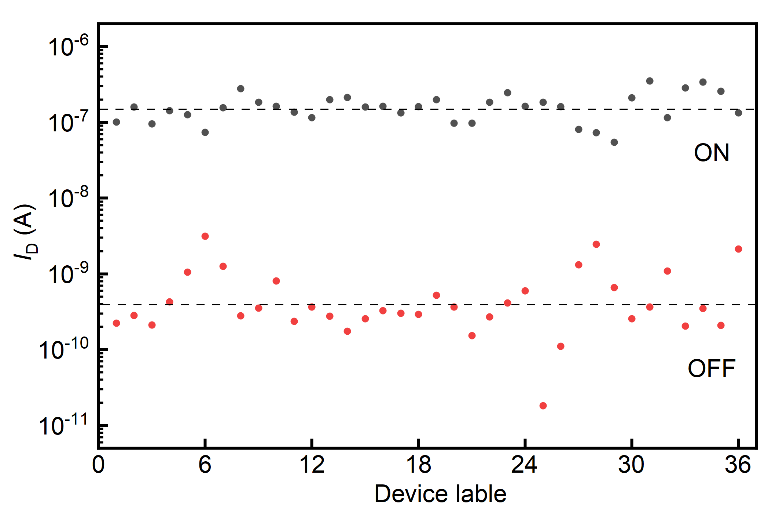


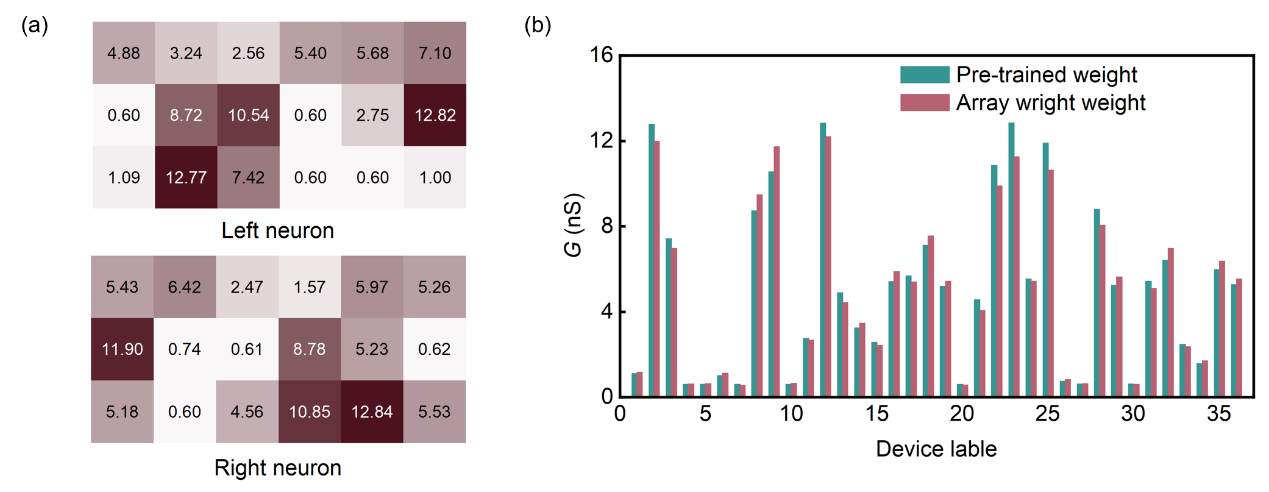


**Supplementary Fig.18. (a) Software pre-trained weights. (b) Comparison of pre-trained weights and actual array written weights.**

**Supplementary Fig.17. The statistical results of the on-off ratios of 36 devices show good consistency.**


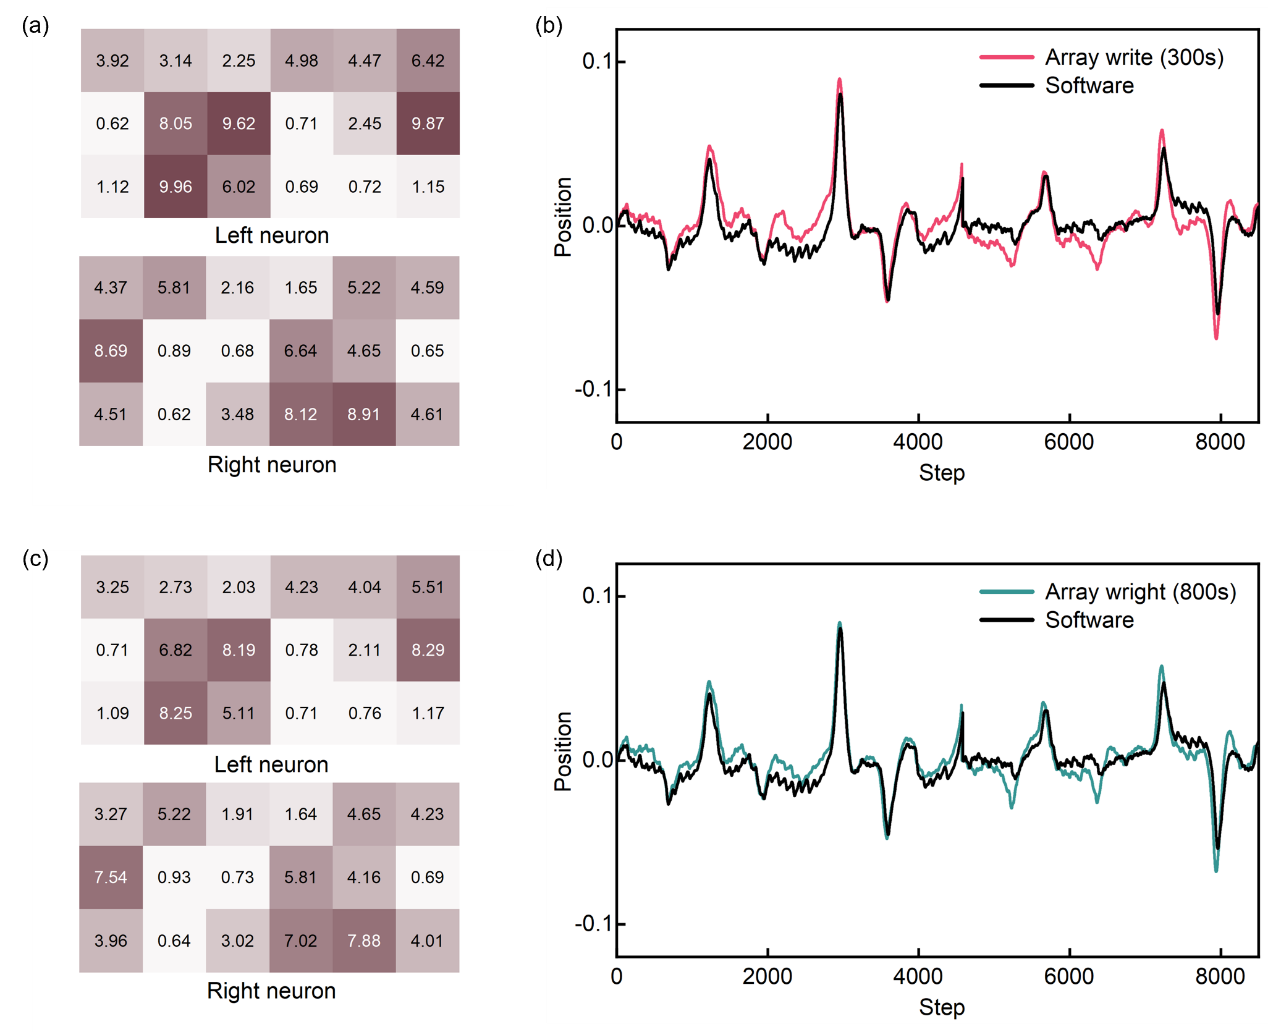


**Supplementary Fig.19. The array weights after writing 300s (a) and 800s (b), demonstrates certain retention performance of the array.** (b), (d) Performance of corresponding weights in autonomous driving tasks. It is worth noting that although the weights have decayed, the network performance has hardly declined, mainly because the dominant weights with larger values ​​are still large compared to other weights.


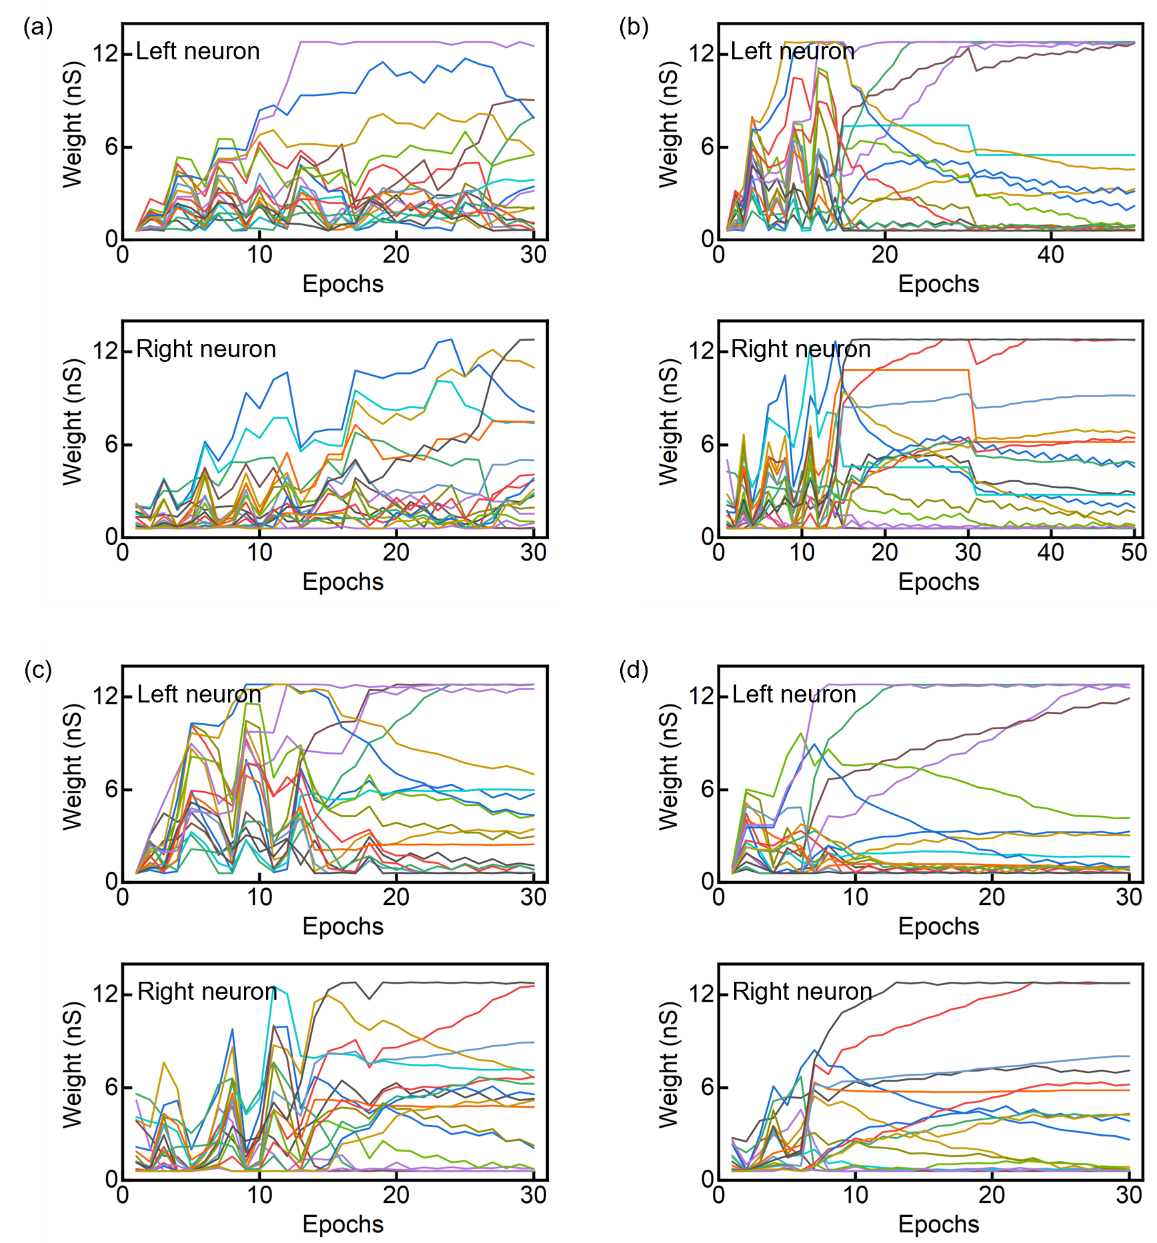


**Supplementary Fig.20. Weight training process under different eligibility trace relaxation time : 20 ms (a), 58 ms (b), 130 ms (c), 186 ms (d).** Each line represents the weight evolution process of a synaptic device.

**Supplementary References**

1. Demirağ Y, Moro F, Dalgaty T, Navarro G, Frenkel C, Indiveri G*, et al.* PCM-trace: scalable synaptic eligibility traces with resistivity drift of phase-change materials. 2021 IEEE International Symposium on Circuits and Systems (ISCAS); 2021: IEEE; 2021. p. 1-5.

2. Lu Y, Li X, Yan B, Yan L, Zhang T, Song Z*, et al.* In‐memory realization of eligibility traces based on conductance drift of phase change memory for energy‐efficient reinforcement learning. *Advanced Materials* 2022, **34**(6)**:** 2107811.

3. Zhou Y, Wang Y, Zhuge F, Guo J, Ma S, Wang J*, et al.* A reconfigurable two‐WSe2‐transistor synaptic cell for reinforcement learning. *Advanced Materials* 2022, **34**(48)**:** 2107754.

4. Amirshahi A, Hashemi M. ECG classification algorithm based on STDP and R-STDP neural networks for real-time monitoring on ultra low-power personal wearable devices. *IEEE transactions on biomedical circuits and systems* 2019, **13**(6)**:** 1483-1493.

5. Luo J, Fu B, Du Y, Wei X, Su C, Yang M*, et al.* Energy-Efficient Ferroelectric-FET-Based Agent With Memory Trace for Enhanced Reinforcement Learning. *IEEE Electron Device Letters* 2023.
